# Supplementary material for: Linagliptin protects rat carotid artery from balloon injury and activates the NRF2 antioxidant pathway
Source: PubMed Central journal article supplement — Exp Anim. 2018 Oct 23;68(1):81–90. doi: 10.1538/expanim.18-0089 (PMC6389508; doi:10.1538/expanim.18-0089), 2018-10-23
Supplement: expanim-68-081-s001.pdf [file expanim-68-081-s001.pdf]

## Supplement figure1

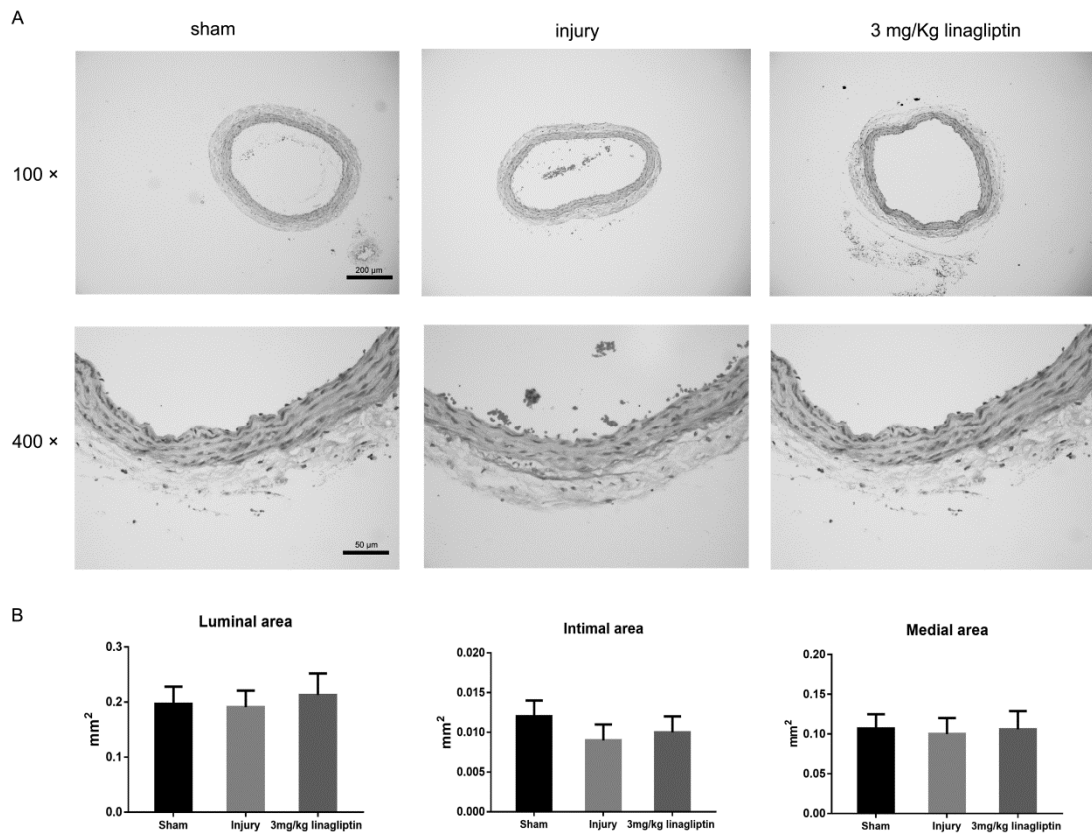

Linagliptin alone did not influence the arterial morphology. The arterial morphology was investigated by H&E staining (A); the area of lumen, intima and media were calculated (B). All data were presented as mean  $\pm$  SD (n=6 for each group. one-way ANOVA followed by the Bonferroni test).
